# Supplementary material for: Insights into the Evolution of Aphid Mitogenome Features from New Data and Comparative Analysis
Source: MDPI journal article supplement (doi:10.3390/ani12151970), 2022-08-03
Supplement: s1 [file s1]

## Supplementary Figures

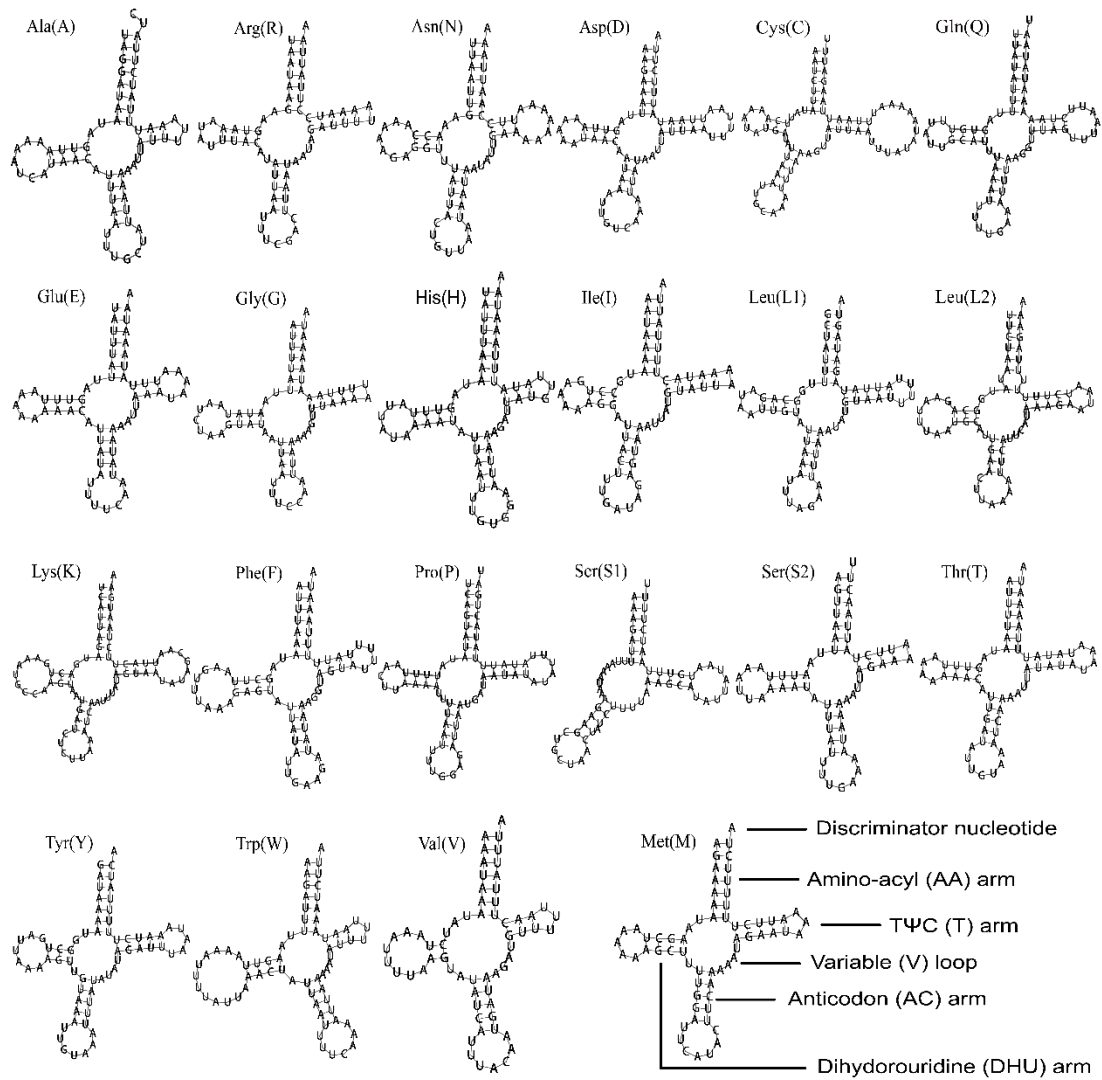

**Figure S1.** Secondary structures of the transfer RNA genes (tRNAs) in mitogenome of *Ceratovacuna keduensis*.

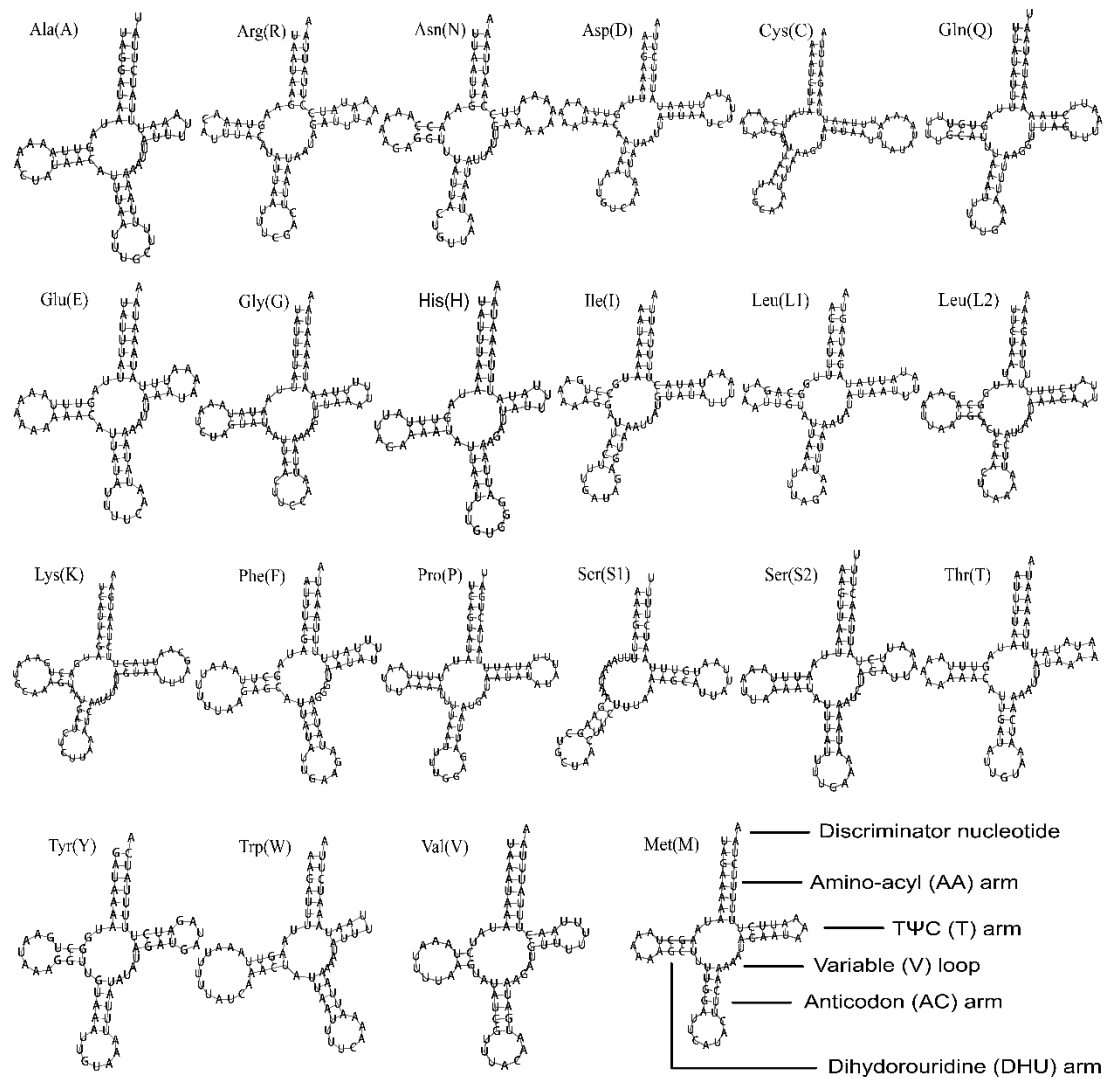

**Figure S2.** Secondary structures of the transfer RNA genes (tRNAs) in mitogenome of *Pseudoregma panicola*.

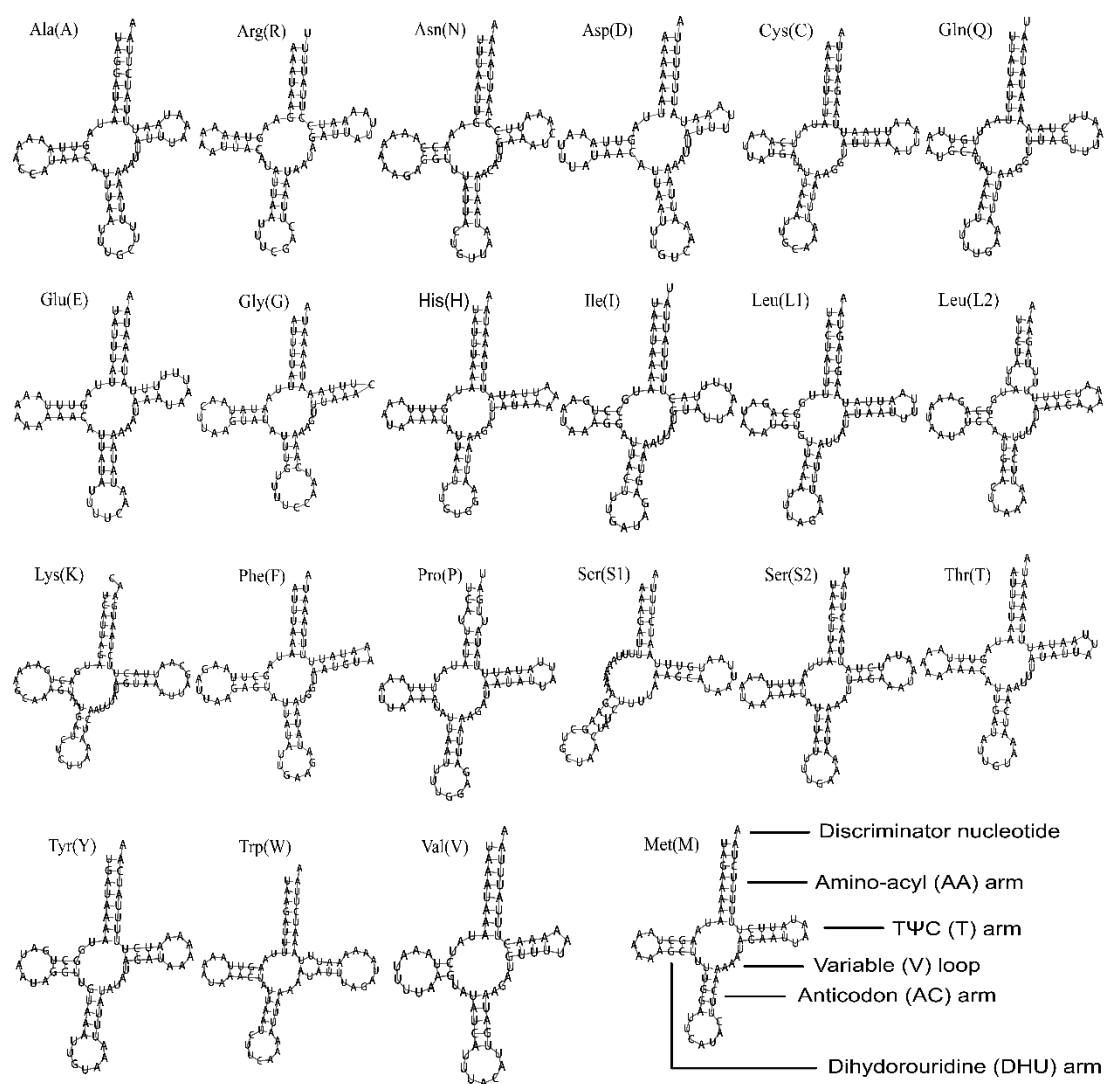

**Figure S3.** Secondary structures of the transfer RNA genes (tRNAs) in mitogenome of *Nippolachnus piri*.
