# Supplementary material for: Insights into the Evolution of Aphid Mitogenome Features from New Data and Comparative Analysis
Source: Animals (Basel). 2022 Aug 3;12(15):1970. doi: 10.3390/ani12151970 (PMC9367533; doi:10.3390/ani12151970)
Supplement: Supplementary file 1 [file animals-12-01970-s001.zip › Supplementary_Tables.xlsx]

## Sheet: Table S1
Table S1. Information of complete mitogenomes in aphids.
Family	Subfamily		Species	Accession Number	Length (bp)	AT (%)	CR (bp)	CR AT (%)	TR within CR (size × copy number)	RR (bp)	RR AT (%)	TR in RR (size × copy number)
Adelgidae			Adelges tsugae	MT263947	16056	83.8004	735	93.61	-	-
Aphididae	Lachninae	Stomaphidini	Stomaphis sinisalicis	NC_053790	17109	84.8	919	91.62	72 × 4.5	1489	85.9	264 × 5.6
		Tuberolachnini	Nippolachnus piri	OL069343	17033	83.9	1699	86.12	477 × 3.5	589	87.78	302 × 2
	Hormaphidinae	Cerataphidini	Ceratovacuna keduensis	OL069341	16138	84.9	657	93.76	73 × 2	715	85.31	238 × 2.3
		Cerataphidini	Pseudoregma bambucicola	NC_044640	16632	85.101	804	95.07	-	1040	86.73	252 × 4.1
		Cerataphidini	Pseudoregma panicola	OL069342	16059	85	728	92.72	53 × 2.8	528	84.28	254 × 2.1
		Hormaphidini	Hamamelistes spinosus	MT010853	15089	81.7549	528	82.36	-	-	-	-
		Hormaphidini	Hormaphis betulae	NC_029495	15088	82.2574	509	82.32	-	-	-	-
		Nipponaphidini	Schizoneuraphis gallarum	NC_053624	14990	82.6	473	83.3	-	-	-	-
	Mindarinae		Mindarus keteleerifoliae	NC_033410	15199	84.4661	687	88.93	-	-	-	-
	Eriosomatinae	Eriosomatini	Eriosoma lanigerum	NC_033352	15640	84.7442	803	88.05	41 × 3.7	-	-	-
		Eriosomatini	Paracolopha morrisoni	NC_045103	16330	84.9235	932	88.74	249 × 2.2	457	87.3085	208 × 2.2
		Fordini	Baizongia pistaciae	NC_035314	15602	84.8673	623	89.09	133 × 2.2	-	-	-
		Fordini	Floraphis choui	NC_035310	15308	84.0476	648	86.27	-	-	-	-
		Fordini	Floraphis meitanensis	NC_035316	15301	84.0664	648	86.11	-	-	-	-
		Fordini	Kaburagia rhusicola ensigallis	MF043984	16164	83.2467	1397	82.25	57 × 2.4 and 57 × 2.4	-	-	-
		Fordini	Kaburagia rhusicola ovatirhusicola	MF043985	16184	83.4343	1417	82.56	57 × 2.4 and 57 × 2.5	-	-	-
		Fordini	Kaburagia rhusicola ovogallis	MF043986	16164	83.2653	1401	82.16	57 × 2.4 and 57 × 2.6	-	-	-
		Fordini	Kaburagia rhusicola rhusicola	MF043987	16159	83.1982	1397	81.75	57 × 2.4 and 57 × 2.7	-	-	-
		Fordini	Meitanaphis elongallis	NC_035315	16191	84.1949	1440	87.08	-	-	-	-
		Fordini	Meitanaphis flavogallis	NC_035312	16150	83.3251	1396	81.87	57 × 2.4 and 57 × 2.9	-	-	-
		Fordini	Meitanaphis microgallis	NC_047419	16191	84.3555	1421	88.03	2 × 91	-	-	-
		Fordini	Melaphis rhois	NC_036065	15436	82.7935	703	84.92	68 × 2.7	-	-	-
		Fordini	Nurudea ibofushi	NC_035311	16054	84.1971	713	85.98	76 × 2.4 and 43 × 2.3	839	89.7497	335 × 2.5
		Fordini	Nurudea shiraii	NC_035301	15389	84.0925	647	84.54	-	-	-	-
		Fordini	Nurudea yanoniella	NC_035313	15858	83.6928	591	85.45	-	456	84.6491	226 × 2.0
		Fordini	Schlechtendalia chinensis	NC_032386	16047	84.2027	705	85.53	43 × 2.3	839	89.2729	335 × 2.5
		Fordini	Schlechtendalia peitan	NC_035302	15609	84.1886	928	87.82	108 × 2.8	-	-	-
	Greenideinae	Cervaphidini	Cervaphis quercus	NC_024926	15272	84.8088	657	90.71	-	-	-	-
		Greenideini	Eutrichosiphum pasaniae	NC_054157	16500	85.5	996	92.27	272 × 2.3	916	87.6638	222 × 4.1
		Greenideini	Greenidea ficicola	NC_048525	17361	85.7209	1598	92.55	281 × 3.1	950	86.9474	243 × 3.9
		Greenideini	Greenidea psidii	NC_041198	16202	85.3722	940	89.78	49 × 6.5	467	86.9379	242 × 1.9
		Greenideini	Mollitrichosiphum tenuicorpus	NC_054348	15727	84.5	680	90.44	43 × 2.4	474	87.5527	217 × 2.2
		Schoutedeniini	Schoutedenia ralumensis	MT381994	16051	84.4683	542	84.13	-	1000	85.9	305 × 3.3
	Chaitophorinae	Chaitophorini	Periphyllus diacerivorus	MZ665537	16418	84.1	856	89.25	70 × 4.1	544	87.5	238 × 2.3
	Calaphidinae	Panaphidini	Appendiseta robiniae	NC_042165	15049	81.7197	202	87.13	-	-	-	-
		Panaphidini	Therioaphis trifolii	MK766411	16068	82.6799	856	85.17	168 × 1.9	-	-	-
	Aphidinae	Aphidini	Aphis aurantii	MN397939	15469	83.4702	810	82.59	171 × 2	-	-	-
		Aphidini	Aphis citricidus	NC_043903	16763	84.0243	763	83.36	176 × 1.8	1428	88.5854	195 × 7.3
		Aphidini	Aphis craccivora	NC_031387	15308	83.734	301	87.71	-	-	-	-
		Aphidini	Aphis fabae mordvilkoi	NC_039988	15346	83.5267	671	84.05	-	-	-	-
		Aphidini	Aphis glycines	NC_045236	17954	84.3322	1158	84.19	172 × 3.9	2343	89.8421	195 × 12
		Aphidini	Aphis gossypii	NC_024581	15869	83.7293	627	84.69	-	786	88.2952	393 × 2
		Aphidini	Aphis spiraecola	NC_053819	16500	84	803	83.94	172 × 2	-	-	-
		Aphidini	Hyalopterus pruni	NC_050904	15410	83.7768	638	86.05	-	300	88.3333	160 × 1.9
		Aphidini	Melanaphis sacchari	MW811104	15111	84.3	145	94.48	-	458	88.4279	141 × 3.2
		Aphidini	Rhopalosiphum nymphaeae	NC_046740	15594	84.276	874	87.55	112 × 3	-	-	-
		Aphidini	Schizaphis graminum	NC_006158	15721	83.9387	622	86.82	-	635	84.8819	153 × 4.2
		Macrosiphini	Acyrthosiphon pisum	NC_011594	16971	84.721	1006	89.17	124 × 3.7	1513	89.0945	205 × 7.4
		Macrosiphini	Brevicoryne brassicae	NC_056270	15927	84.2	913	88.61	124 × 3.7	-	-	-
		Macrosiphini	Cavariella salicicola	NC_022682	16317	83.9064	1137	85.48	109 × 5.3	596	90.9396	199 × 3
		Macrosiphini	Chaetosiphon fragaefolii	LC590896	16108	83.9	1168	85.87	114 × 4.5	436	88.0734	236 × 1.8
		Macrosiphini	Diuraphis noxia	NC_022727	15784	84.7567	664	86.6	-	644	90.6832	195 × 3.3
		Macrosiphini	Indomegoura indica	NC_045897	15220	83.8699	438	84.93	111 × 2.7	-	-	-
		Macrosiphini	Myzus persicae	NC_029727	17382	84.1388	2531	87.12	437 × 4.2	-	-	-
		Macrosiphini	Neotoxoptera formosana	MW534268	15642	83.6	1053	83.29	122 × 4	-	-	-
		Macrosiphini	Sitobion avenae	NC_024683	15180	84.2161	430	93.03	-	-	-	-
		Macrosiphini	Uroleucon erigeronense	MZ695840	15691	84.2	968	88.22	172 × 2	-	-	-
TR: tandem repeat; RR: repeat region; CR: control region.

## Sheet: Table S2
Table S2. Features of the mitochondrial genome of Ceratovacuna keduensis.
Name	Strand	Location	Length (bp)	Start Codons	Stop Codons	Intergenic Sequence (bp)
cox1	J	1-1536	1536	ATA	TAA	0
trnL2 (taa)	J	1537-1605	69			-1
cox2	J	1605-2279	675	ATC	TAA	6
trnK (ctt)	J	2286-2360	75			0
trnD (gtc)	J	2361-2428	68			0
atp8	J	2429-2584	156	ATC	TAA	-20
atp6	J	2565-3215	651	ATT		0
cox3	J	3216-4001	786	ATG	TAA	20
trnA (tgc)	J	4022-4087	66			11
trnN (gtt)	J	4099-4164	66			-1
trnS1 (gct)	J	4164-4227	64			19
trnR (tcg)	J	4247-4310	64			31
trnG (tcc)	J	4342-4407	66			-3
nad3	J	4405-4761	357			1
trnE (ttc)	J	4763-4825	63			53
repeat region	J	4879-5593	715			39
trnF (gaa)	N	5700-5633	68			18
nad5	N	7383-5719	1665	ATG	TAA	59
trnH (gtg)	N	7506-7443	64			-1
nad4	N	8826-7506	1321	ATG	T	-7
nad4l	N	9113-8820	294	ATG	TAA	3
trnT (tgt)	J	9117-9181	65			3
trnP (tgg)	N	9255-9185	71			1
nad6	J	9257-9754	498	ATG	TAA	-1
cob	J	9754-10866	1113	ATG	TAA	18
trnS2 (tga)	J	10885-10947	63			8
nad1	N	11891-10956	936	ATT	TAA	-1
trnL1 (tag)	N	11956-11892	65			-1
rrnL	N	13232-11956	1277			0
trnV (tac)	N	13294-13233	62			21
rrnS	N	14073-13316	758			0
control region	J	14074-14730	657			0
trnI (gat)	J	14731-14793	63			-4
trnQ (ttg)	N	14858-14790	69			15
trnM (cat)	J	14874-14938	65			0
nad2	J	14939-15922	984	ATA	TAA	-1
trnW (tca)	J	15922-15989	68			-8
trnC (gca)	N	16056-15982	75			14
trnY (gta)	N	16137-16071	67			1

## Sheet: Table S3
Table S3. Features of the mitochondrial genome of Pseudoregma panicola.
Name	Strand	Location	Length (bp)	Start Codons	Stop Codons	Intergenic Sequence (bp)
cox1	J	1-1536	1536	ATA	TAA	0
trnL2 (taa)	J	1537-1605	69			2
cox2	J	1608-2279	672	ATA	TAA	4
trnK (ctt)	J	2284-2358	75			0
trnD (gtc)	J	2359-2427	69			0
atp8	J	2428-2583	156	ATC	TAA	-20
atp6	J	2564-3214	651	ATT		0
cox3	J	3215-4000	786	ATG	TAA	16
trnA (tgc)	J	4017-4081	65			6
trnN (gtt)	J	4088-4153	66			-1
trnS1 (gct)	J	4153-4215	63			22
trnR (tcg)	J	4238-4302	65			87
trnG (tcc)	J	4390-4457	68			-1
nad3	J	4457-4810	354	ATT	TAA	4
trnE (ttc)	J	4815-4879	65			37
repeat region	J	4917-5444	528			39
trnF (gaa)	N	5551-5484	68			13
nad5	N	7289-5565	1725	ATT	TAA	-1
trnH (gtg)	N	7352-7289	64			-42
nad4	N	8672-7311	1362	ATG	TAA	-7
nad4l	N	8959-8666	294	ATG	TAA	4
trnT (tgt)	J	8964-9027	64			3
trnP (tgg)	N	9101-9031	71			1
nad6	J	9103-9600	498	ATT	TAA	-1
cob	J	9600-10712	1113	ATG	TAA	12
trnS2 (tga)	J	10725-10791	67			7
nad1	N	11734-10799	936	ATT	TAA	-1
trnL1 (tag)	N	11799-11735	65			0
rrnL	N	13074-11800	1275			0
trnV (tac)	N	13140-13075	66			23
rrnS	N	13921-13164	758			0
control region	J	13922-14649	728			0
trnI (gat)	J	14650-14716	67			-4
trnQ (ttg)	N	14780-14713	68			11
trnM (cat)	J	14792-14858	67			-1
nad2	J	14858-15841	984	ATA	TAA	-1
trnW (tca)	J	15841-15907	67			-9
trnC (gca)	N	15975-15899	77			18
trnY (gta)	N	16058-15994	65			1

## Sheet: Table S4
Table S4. Features of the mitochondrial genome of Nippolachnus piri.
Name	Strand	Location	Length (bp)	Start Codons	Stop Codons	Intergenic Sequence (bp)
cox1	J	1–1531	1531	ATA	T	-1
trnL2 (taa)	J	1531–1600	70			3
cox2	J	1604–2275	672	ATA	TAA	2
trnK (ctt)	J	2278–2353	76			0
trnD (gtc)	J	2354–2415	62			0
atp8	J	2416–2574	159	ATT	TAA	-20
atp6	J	2555–3208	654	ATT		3
cox3	J	3212–3997	786	ATG	TAA	5
trnG (tcc)	J	4003–4067	65			0
nad3	J	4068–4421	354	ATA	TAA	-3
trnA (tgc)	J	4419–4485	67			-2
trnR (tcg)	J	4484–4548	65			-2
trnN (gtt)	J	4547–4615	69			-2
trnS1 (gct)	J	4614–4676	63			7
trnE (ttc)	J	4684–4748	65			21
trnT (tgt)	J	4770–4834	65			4
nad6	J	4839–5330	492	ATA		0
cytb	J	5331–6443	1113	ATG	TAA	8
trnS2 (tga)	J	6452–6521	70			17
repeat region	J	6539–7127	589			30
trnF (gaa)	N	7224–7158	67			9
nad5	N	8904–7234	1671	ATT	TAA	50
trnH (gtg)	N	9021–8955	67			-1
nad4	N	10329–9021	1309	ATA	T	8
nad4l	N	10631–10338	294	ATG	TAA	36
trnP (tgg)	N	10736–10668	69			36
nad1	N	11708–10773	936	ATT	TAA	0
trnL1 (tag)	N	11774–11708	67			7
rrnL	N	13079–11782	1298			0
trnV (tac)	N	13145–13080	66			16
rrnS	N	13938–13162	777			0
control region	J	13939–15637	1699			0
trnI (gat)	J	15638–15704	67			-5
trnQ (ttg)	N	15767–15700	68			6
trnM (cat)	J	15774–15841	68			-1
nad2	J	15841–16818	978	ATA	TAA	-1
trnW (tca)	J	16820–16891	72			-10
trnC (gca)	N	16951–16882	70			2
trnY (gta)	N	17021–16954	68			12
